# Supplementary material
Source: PubMed Central journal article supplement (PMC7218439)

## Supplementary data

### Methods

**Extraction protocol H, recommended by the International Human Microbiome Consortium** (IHMS\_SOP\_07; <http://www.microbiome-standards.org>).

- Total DNA was extracted from 0.2 g of fecal samples.
- Frozen feces were treated with 250  $\mu$ L of guanidine thiocyanate and 40  $\mu$ L of N-lauroyl sarcosine 10%. After thawing, 500  $\mu$ L of N-lauroyl sarcosine 5% was added and the samples incubated at 70 °C for 1 hour for cell lysis.
- To improve cellular lysis, 750  $\mu$ L glass beads (0.1-mm diameter) were added, and agitation carried out at maximum speed for 10 min in a Bead Beater™ (Biospec, Bartlesville, OK).
- Polyvinylpyrrolidone (15 mg) was added to ensure removal of polyphenol contamination that could inhibit subsequent qPCR reactions. Samples were vortexed and centrifuged at 18 000 g for 5 min, and the supernatant was recovered.
- The remaining pellet was washed with 500  $\mu$ L of TENP [50 mM Tris (pH 8), 20 mM EDTA (pH 8), 100 mM NaCl, 1% polyvinylpyrrolidone] and centrifuged at 18 000 g for 5 min. The washing step was repeated twice more and the resulting supernatants pooled.
- Nucleic acids were precipitated by addition of one volume of isopropanol, storage 15 min at room temperature, and centrifugation at 18 000 g for 10 min.
- The pellet was resuspended in 450  $\mu$ L of phosphate buffer and 50  $\mu$ L of potassium acetate and incubated at 4°C for 1h30. Samples were centrifuged at 18 000 g for 30 min and the supernatant containing the DNA was transferred to a clean 2 mL tube.
- For RNA digestion, 2  $\mu$ L of RNase (10 mg/mL) was added and samples incubated for 30 min at 37 °C.
- For DNA purification, 50  $\mu$ L of sodium acetate and 1 mL of 100% fresh ethanol (stored at 20 °C) were added and leave overnight at -20 °C. Ethanol was then removed after centrifugation for 30 min at 18 000. Two wash were carried out by resuspending the pellets in 1 mL of 70% ethanol, and removing the ethanol after centrifugation at 18 000 g for 5 min.
- DNA was resuspended in 200  $\mu$ L of TE buffer.

**Table S1. Primers used in this study for microbiota analyze by quantitative real-time PCR.**

| Target bacteria                                               | Primers and probes           | Sequence 5'- 3'                                   | Reference                     |
|---------------------------------------------------------------|------------------------------|---------------------------------------------------|-------------------------------|
| All bacteria <sup>1</sup>                                     | F_Bact 1369                  | CGGTGAATACGTTCCCGG                                | Suzuki <i>et al.</i> 2000     |
|                                                               | R_Prok1492                   | TACGGCTACCTTGTTACGACTT                            |                               |
|                                                               | P_TM1389F                    | 6FAM-CTTGTACACACCGCCCGTC                          |                               |
| <i>Bacteroides / Prevotella</i> <sup>1</sup>                  | F_Bacter 11                  | CCTWCGATGGATAGGGGTT                               | Furet <i>et al.</i> 2009      |
|                                                               | R_Bacter 08                  | CACGCTACTTGGCTGCTTCAG                             |                               |
|                                                               | P_Bac303                     | VICAAGGTCCCCACATTGMGB                             |                               |
| Cluster IV<br>( <i>Clostridium leptum</i> group) <sup>1</sup> | F_Clept 09                   | CCTCCGTGCCGSAGTTA                                 | Furet <i>et al.</i> 2009      |
|                                                               | R_Clept 08                   | GAATTAACCACATACTCCACTGCTT                         |                               |
|                                                               | P-Clep 01                    | 6FAMACAATAAGTAATCCACC                             |                               |
| Cluster XIVa<br>( <i>Blautia coccoides</i> ) <sup>2</sup>     | MatsuF<br>MatsuR             | CACATTGGGACTGAGACACG<br>TAAATCCGGATAACGCTTGC      | Matsuki <i>et al.</i> 2004    |
| Cluster I/II <sup>2</sup>                                     | Cluster I F1<br>Cluster I F2 | TACCHRBAGGAGGAAGCCAC<br>GTTCTTCTAATCTCTACGCAT     | Song <i>et al.</i> , 2004     |
| <i>Enterococcus sp</i> <sup>2</sup>                           | F_Enteroc<br>R_Enteroc       | CCCTTATTGTTAGTTGCCATCATT<br>ACTCGTTGTACTTCCCATTGT | Rinttilä <i>et al.</i> , 2004 |
| <i>Lactobacillus / Leuconostoc / Pediococcus</i> <sup>2</sup> | F_Lacto 05<br>R_Lacto 04     | AGCAGTAGGGAATCTTCCA<br>CGCCACTGGTCYTCCATATA       | Furet <i>et al.</i> 2009      |
| <i>Escherichia coli</i> <sup>2</sup>                          | E.coli F<br>E.coli R         | CATGCCGCGTGTATGAAGAA<br>CGGGTAACGTCAATGAGCAAA     | Furet <i>et al.</i> 2009      |

Detection type: <sup>1</sup>Taqman; <sup>2</sup>SYBR®

Supplementary references:

Suzuki MT, Taylor LT and DeLong EF. Quantitative analysis of small-subunit rRNA genes in mixed microbial populations via 5'-nuclease assays. *Appl Environ Microbiol.* 2000;11: 4605–4614.

Furet JP, Firmesse O, Gourmelon M, Bridonneau C, Tap J, Mondot S, Dore J and Corthier G. Comparative assessment of human and farm animal faecal microbiota using real-time quantitative PCR. *FEMS Microbiol Ecol.* 2009;68:351-362.

Matsuki T, Watanabe K, Fujimoto J, Takada T and Tanaka R. Use of 16S rRNA gene-targeted group-specific primers for real-time PCR analysis of predominant bacteria in human feces. *Appl Environ Microbiol.* 2004;70:7220-7228.

Song Y, Liu C and Finegold SM. Real-time PCR quantitation of clostridia in feces of autistic children. *Appl Environ Microbiol.* 2004;70:6459-6465.

Rinttilä T, Kassinen A, Malinen E, Krogius L, Palva A. Development of an extensive set of 16S rDNA-targeted primers for quantification of pathogenic and indigenous bacteria in fecal samples by real-time PCR. *J Appl Microbiol.* 2004;97(6):1166-77.

**Table S2. Characteristics of study participants.**

|                                          | <b>aGVHD</b><br>(n = 35) | <b>Control</b><br>(n = 35) | <b>Total</b><br>(n = 70) |
|------------------------------------------|--------------------------|----------------------------|--------------------------|
| <b>Pre-transplant characteristics</b>    |                          |                            |                          |
| Age, mean in y [range]                   | 49.2 [16.4-69.0]         | 46.7 [18.2-68.9]           | 47.9 [16.4-69.0]         |
| Gender (male/female)                     | 22/13                    | 19/16                      | 41/29                    |
| Underlying disease, n (%)                |                          |                            |                          |
| Leukemia                                 | 11 (31.4)                | 22 (62.8)                  | 33 (47.1)                |
| Myelodysplastic syndrome                 | 17 (48.6)                | 5 (14.3)                   | 22 (31.4)                |
| Lymphoma                                 | 5 (14.3)                 | 3 (8.6)                    | 8 (11.4)                 |
| Bone marrow failure                      | 2 (5.7)                  | 4 (11.4)                   | 6 (8.6)                  |
| Other                                    | 0 (0.0)                  | 1 (2.9)                    | 1 (1.4)                  |
| <b>Transplant characteristics, n (%)</b> |                          |                            |                          |
| Myeloablative conditioning               | 8 (22.8)                 | 16 (45.7)                  | 24 (34.3)                |
| Total body irradiation                   | 7 (20.0)                 | 9 (25.7)                   | 16 (22.9)                |
| Stem cell source                         |                          |                            |                          |
| Peripheral blood                         | 27 (77.1)                | 26 (74.3)                  | 53 (75.7)                |
| Bone marrow                              | 5 (14.3)                 | 7 (20.0)                   | 12 (17.2)                |
| Cord blood                               | 3 (8.6)                  | 2 (5.7)                    | 5 (7.1)                  |
| HLA match                                |                          |                            |                          |
| Identical sibling                        | 11 (31.4)                | 17 (48.6)                  | 28 (40.0)                |
| Matched unrelated                        | 16 (45.7)                | 6 (17.1)                   | 22 (31.4)                |
| Mismatched unrelated                     | 7 (20.0)                 | 12 (34.3)                  | 19 (27.2)                |
| Mismatched relative                      | 1 (2.9)                  | 0 (0.0)                    | 1 (1.4)                  |
| <b>Dead at 1 year, n (%)</b>             | <b>16 (45.7)</b>         | <b>9 (25.7)</b>            | <b>25 (35.7)</b>         |
| Main cause of death, n (%)               |                          |                            |                          |
| Disease                                  | 4 (25.0)                 | 8 (88.9)                   | 12 (48.0)                |
| aGVHD                                    | 11 (68.8)                | 0 (0.0)                    | 11 (44.0)                |
| Infection                                | 1 (6.2)                  | 1 (11.1)                   | 1 (8.0)                  |

Abbreviation: GVHD, graft-versus-host disease.

**Table S3. Characteristics of aGVHD episodes according to gut severity.**

| <b>Number of aGVHD</b>                             | <b>Stage 1</b> | <b>Stage 2 or 3</b> | <b>Total</b> |
|----------------------------------------------------|----------------|---------------------|--------------|
|                                                    | n = 18         | n = 17              | n = 35       |
| Post-transplant onset time (median, [range]) (day) | 17 [10-45]     | 12 [7-27]           | 14 [7-45]    |
| Localization, n (%)                                |                |                     |              |
| Gut                                                | 1 (5.6)        | 4 (23.5)            | 5 (14.3)     |
| Gut and skin                                       | 10 (55.5)      | 9 (53.0)            | 19 (54.2)    |
| Gut and liver                                      | 1 (5.6)        | 0 (0.0)             | 1 (2.8)      |
| Gut, skin and liver                                | 6 (33.3)       | 4 (23.5)            | 10 (28.6)    |
| Stage 1 digestive signs, n (%)                     |                |                     |              |
| Vomiting                                           | 9 (50.0)       |                     |              |
| Diarrhea                                           | 11 (61.1)      |                     |              |
| Unknown                                            | 2 (11.1)       |                     |              |
| Cortico-resistance, n (%)                          | 6 (33.3)       | 7 (41.2)            | 13 (37.1)    |
| Dead at 1 year, n (%)                              | 9 (50.0)       | 7 (41.2)            | 16 (45.7)    |
| Main cause of death, n (%)                         |                |                     |              |
| Disease                                            | 4 (44.4)       | 0 (0.0)             | 4 (25.0)     |
| GVHD                                               | 4 (44.4)       | 7 (100)             | 11 (68.8)    |
| Infection                                          | 1 (11.2)       | 0 (0.0)             | 1 (6.2)      |

**Table S4. Results of 16S negative control.**

Number of OTUs and reads identified in the negative control, and their detection in patient samples according to the data processing. A filter was applied to sequencing data obtained for patient samples to limit the impact of potential contaminants: least abundant OTUs, representing only 1% of the cumulative sequences, and present in less than five subjects were excluded for the analysis.

| Negative control              | No of OTUs | No of reads |
|-------------------------------|------------|-------------|
| <b>Total OTUs</b>             | 128        | 2525        |
| Absent from samples           | 55         | 1664        |
| Present after filtering       | 21         | 93          |
| <b>OTUs with &gt;5 reads</b>  | 65         | 2375        |
| Absent from samples           | 30         | 1602        |
| Present after filtering       | 6*         | 58          |
| <b>OTUs with &gt;10 reads</b> | 39         | 2166        |
| Absent from samples           | 22         | 1533        |
| Present after filtering       | 2†         | 29          |

\*Firmicutes: *Streptococcus* (15 reads)†, *Faecalibacterium* (14 reads)†, *Dialister* (9 reads); Bacteroidetes: *Barnsiella* (7 reads), *Parasutterella* (7 reads), *Ruminococcus 2* (6 reads).

**Figure S1. Antibiotic treatment at the time of stool collection in GVHD patients and controls.**

GVHD patients were sampled at the time of acute GVHD diagnosis, varying from 1 to 6 weeks post-HSCT. Control patients sampled at the same post-transplant week were studied.

Glycopeptide: vancomycin or teicoplanine; Tazo: piperacillin-tazobactam; SMZ: sulfamethoxazole-trimethoprim; Metro: metronidazole; Amox: amoxicillin alone or in combination with ofloxacin; Cefta\*: ceftazidime; Fep\*: cefepime; Penem\*: imipenem or meropenem. \*alone or in combination with a glycopeptide.

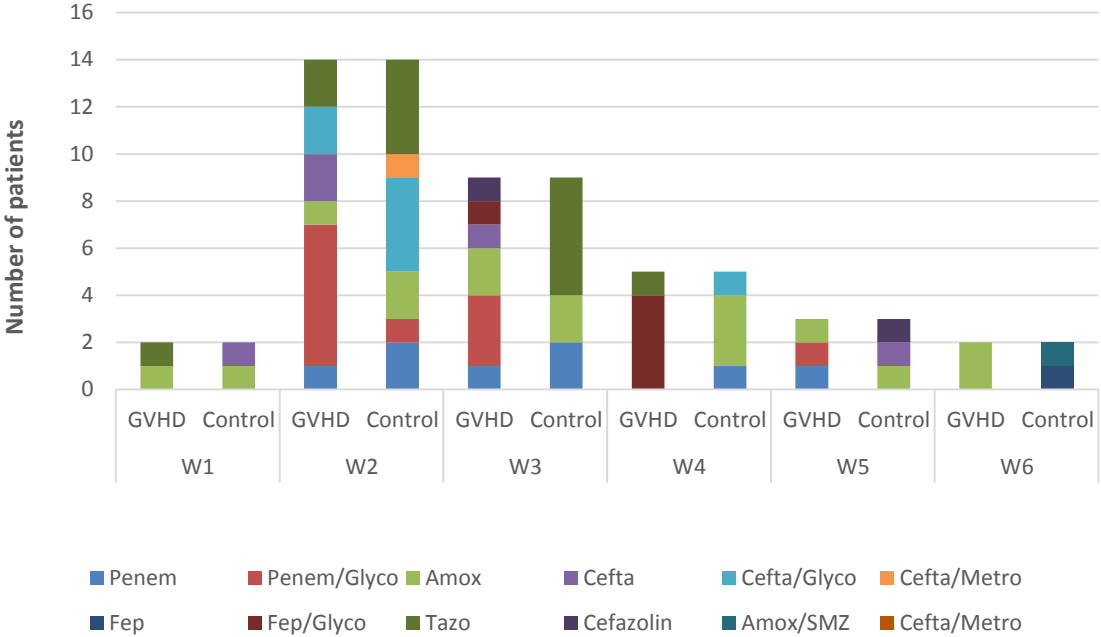

**Figure S2. Enteric microbiome in HSCT patients according to severity of gut aGVHD.**

(A) Relative abundance of sequence reads at the phylum level, and (B) at the genus level assigned to different bacterial taxa in each patient according to clinical status (control, GVHD 1 or GVHD 2-3).

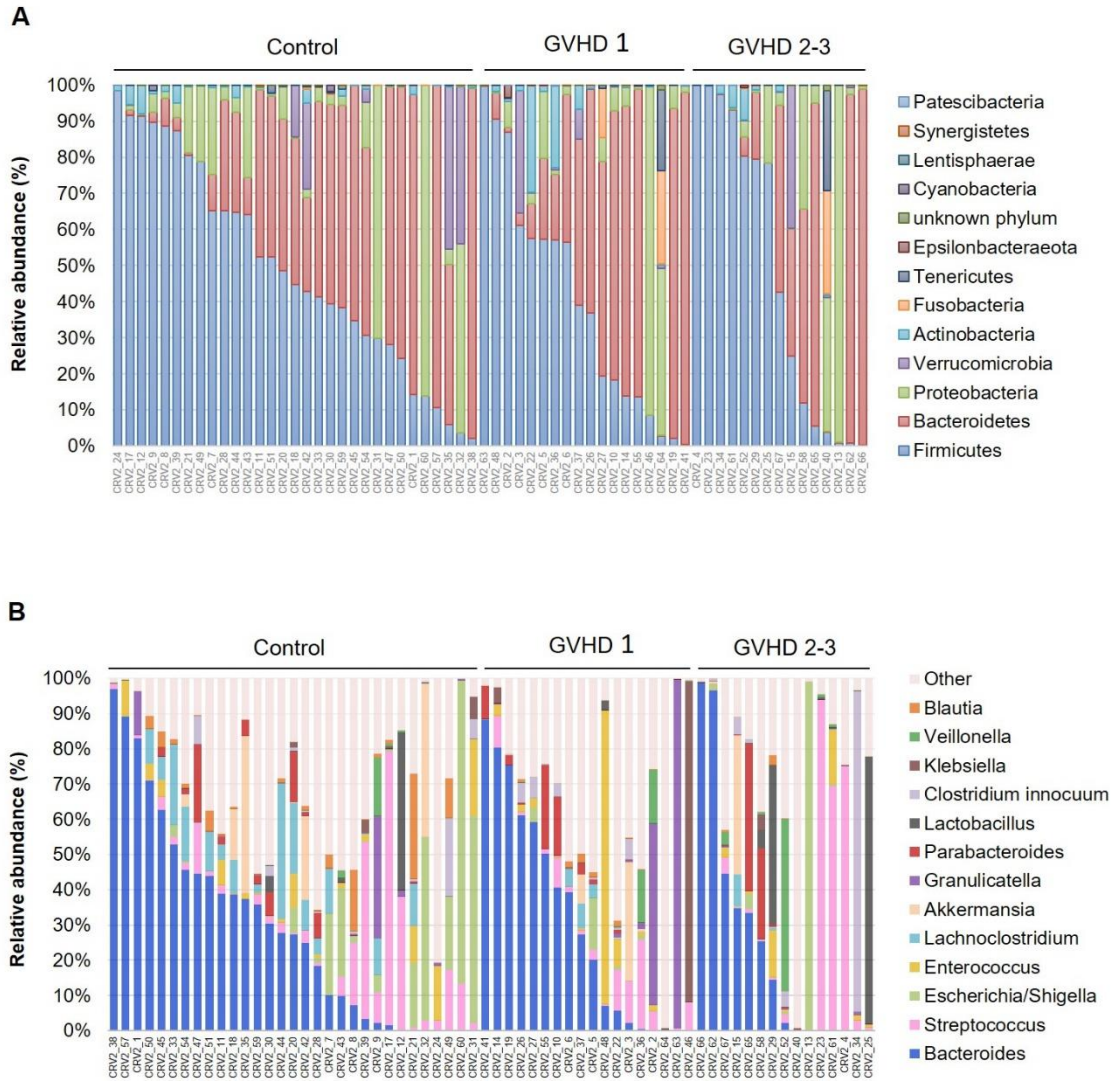

**Figure S3. Quantitative microbiota shifts according to gut aGVHD severity.**

Absolute count of sequences of the 16S rRNA gene was measured using quantitative-PCR targeting 7 major bacterial groups or species of the human gut microbiota. The median level of Cluster XIVa (*Blautia coccoides* group) showed a significant decrease between control subjects and severe aGVHD patients ( $p = 0.007$ ), and between mild and severe gut aGVHD patients ( $p = 0.036$ ). The decreasing trend observed in the levels of *Enterococcus* and *Bacteroides* was not significant after adjustment. Statistical analyses were performed using non-parametric Wilcoxon-Mann-Whitney test with false discovery rate (FDR) correction for multiple testing: FDR  $p^{***} < 0.001$ ,  $p^{**} < 0.01$ ,  $p^{*} < 0.05$ .

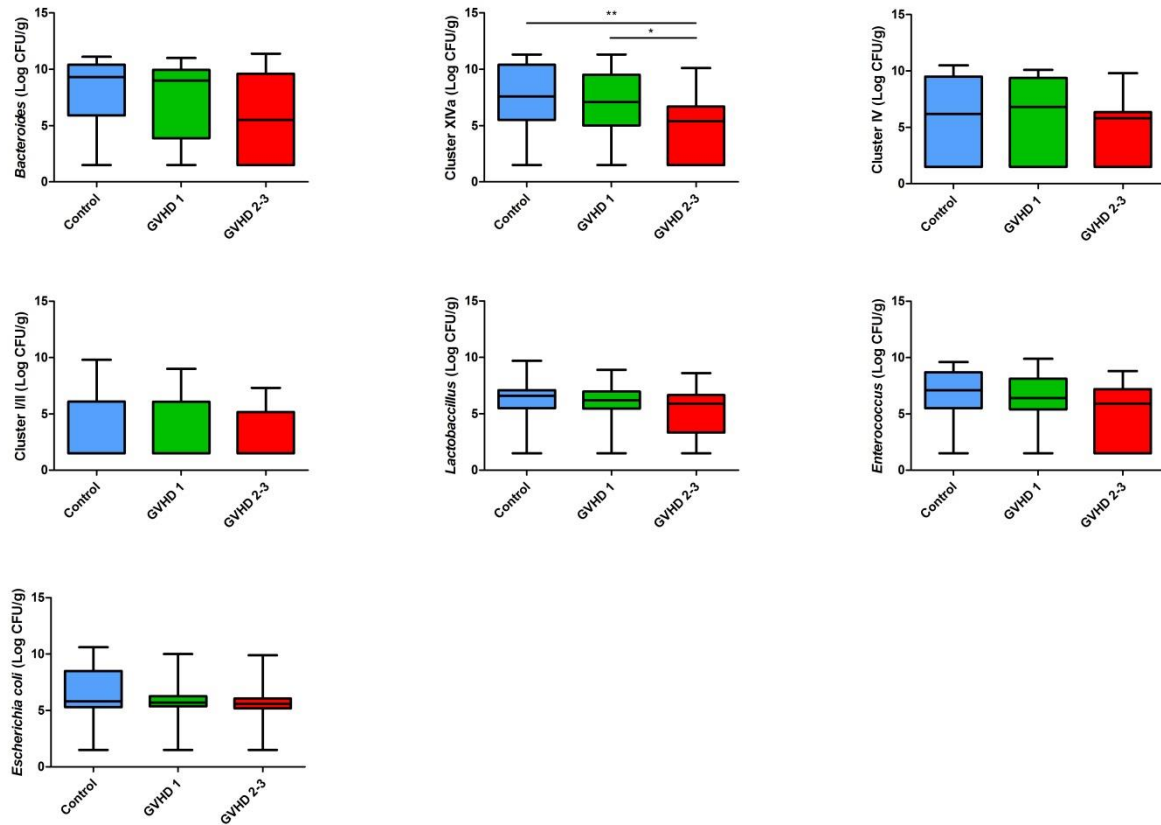

Supplement: advancesADV2020001531-suppl1.pdf [file advancesADV2020001531-suppl1.pdf]
